# Supplementary material for: Contribution of voltage-gated sodium channel β-subunits to cervical cancer cells metastatic behavior
Source: Springer Nature journal article supplement (doi:10.1186/s12935-019-0757-6), 2019-02-15
Supplement: MOESM1 [file 16484810]

**Additional file 1.**

**Contribution of voltage-gated sodium channel  $\beta$ -subunits to cervical cancer cells metastatic behavior**

**Ana Laura Sanchez-Sandoval, Juan Carlos Gomora**

Departamento de Neuropatología Molecular, División de Neurociencias, Instituto de Fisiología Celular, Universidad Nacional Autónoma de México. Ciudad de México, 04510, México.

\*Corresponding author: [jgomora@ifc.unam.mx](mailto:jgomora@ifc.unam.mx)

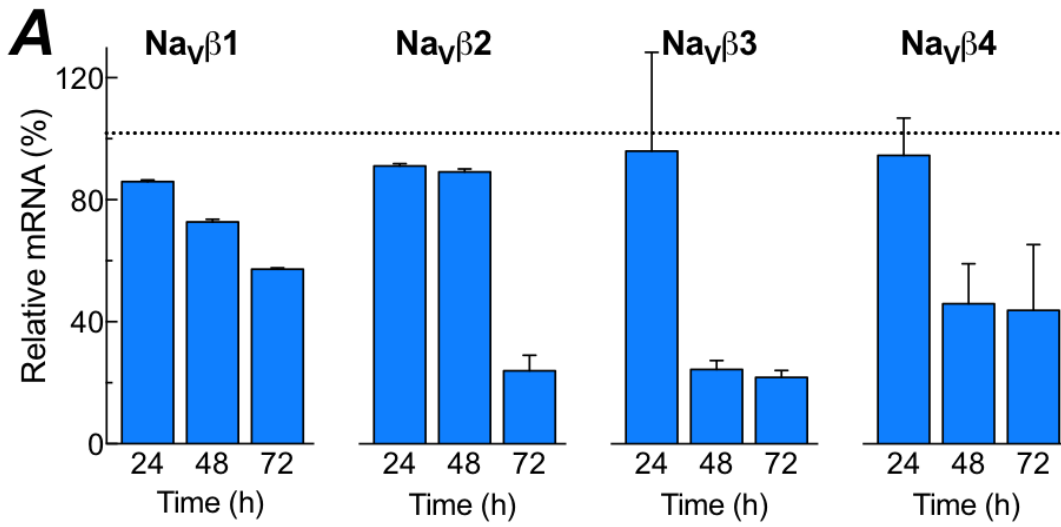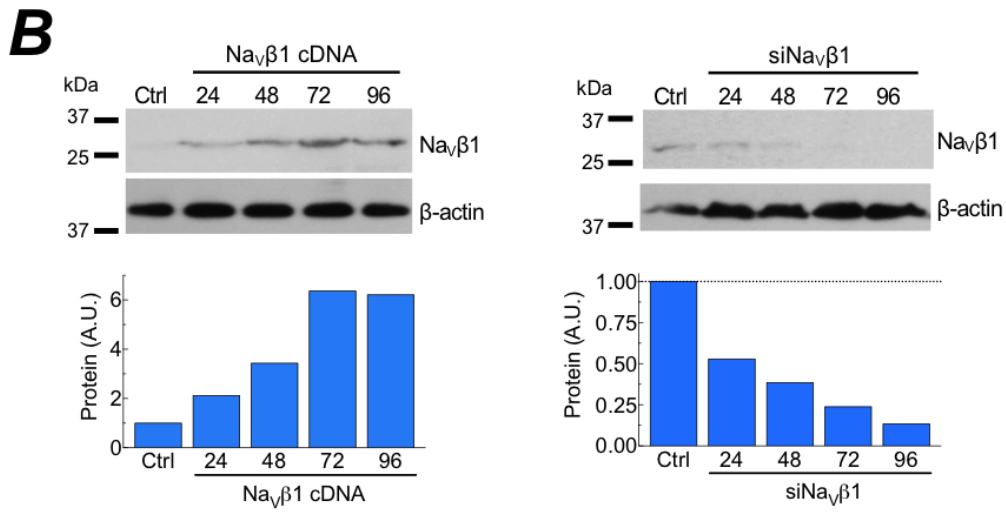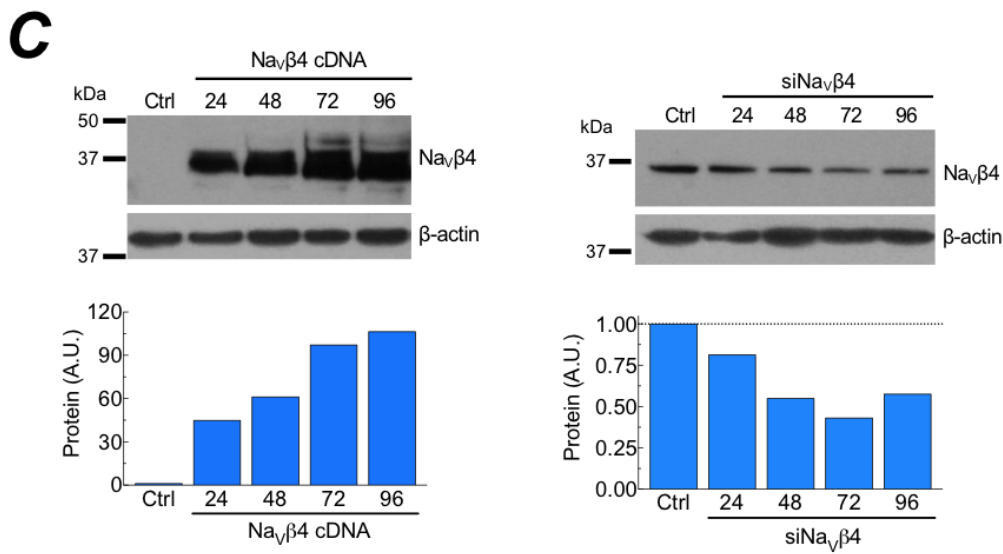

**Additional file 1. Evaluation of Nav $\beta$ s expression after transfecting HeLa cells with siRNAs or cDNAs.** **A.** Real-Time PCR analysis of Nav $\beta$ s mRNA expression levels for HeLa cells 24, 48 and 72 h after transfection with 100 nM of the specific siRNAs for each subunit. Data was normalized with HPRT1 mRNA levels, and relative to each  $\beta$ -subunit mRNA expression in control (mock) conditions (100%, dotted line). Bars denotes mean  $\pm$  S.D. **B, C.** Western blot analysis of Nav $\beta$ 1 and Nav $\beta$ 4 expression in transfected HeLa cells. Protein expression was assessed by using specific antibodies against Nav $\beta$ 1 (**B**) or Nav $\beta$ 4 (**C**) at 24, 48, 72 and 96 h post-transfection with the respective plasmid to overexpress (left panels) or with siRNAs (right panels) to deplete them.  $\beta$ -actin detection was used as a control for loading. Bar graphs show quantified data for Nav $\beta$ s protein expression normalized with  $\beta$ -actin expression for each condition and relative to control cells.
