# Supplementary material for: Contribution of voltage-gated sodium channel β-subunits to cervical cancer cells metastatic behavior
Source: Springer Nature journal article supplement (doi:10.1186/s12935-019-0757-6), 2019-02-15
Supplement: MOESM2 [file 16484810]

**Additional file 2.**

**Contribution of voltage-gated sodium channel  $\beta$ -subunits to cervical cancer cells metastatic behavior**

**Ana Laura Sanchez-Sandoval, Juan Carlos Gomora\***

Departamento de Neuropatología Molecular, División de Neurociencias, Instituto de Fisiología Celular, Universidad Nacional Autónoma de México. Ciudad de México, 04510, México.

\*Corresponding author: [jgomora@ifc.unam.mx](mailto:jgomora@ifc.unam.mx)

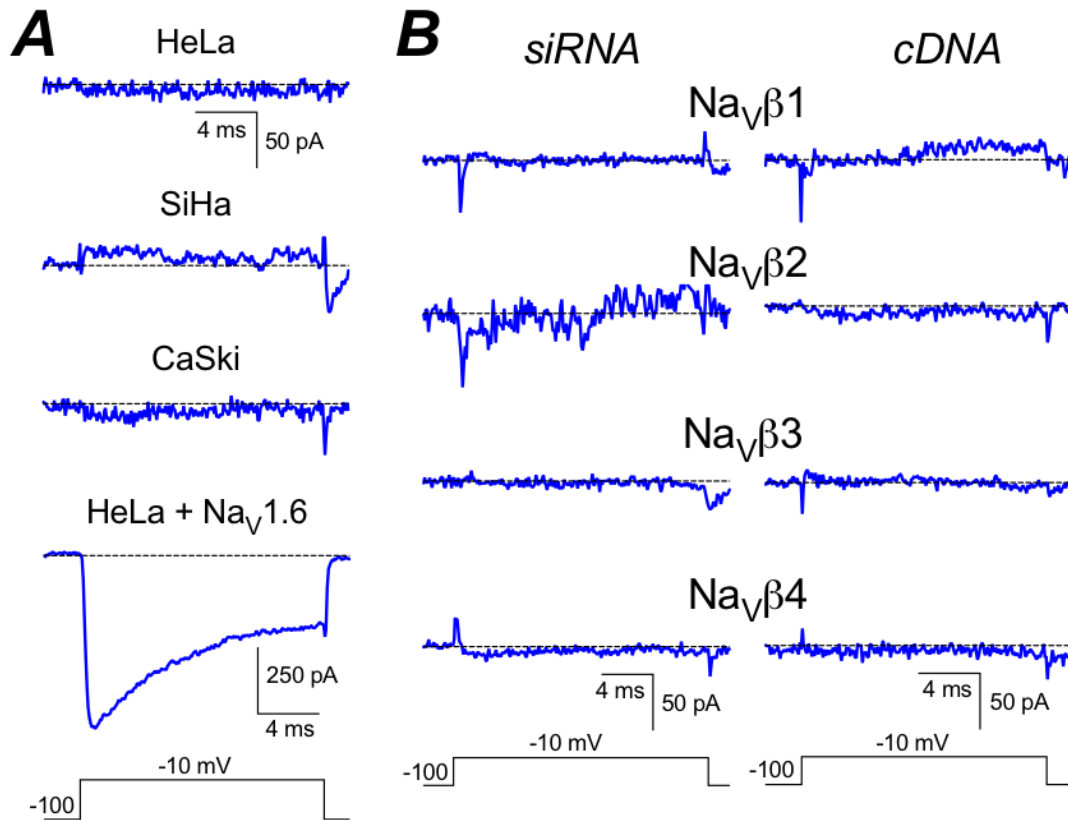

**Additional file 2. Analysis of the expression of voltage-gated sodium currents in CeCa cells.**

Whole-cell patch-clamp experiments were done to investigate the presence of functional  $Na_V$   $\alpha$ -subunits in the plasma membrane in CeCa cells. **A**. None of the three CeCa cell lines showed the presence of voltage-gated sodium currents in basal conditions ( $n = 30$  in total), whereas prominent  $Na_V$  currents were recorded in HeLa cells transiently transfected with  $Na_V1.6$ , used as a positive control (bottom recording). **B**. HeLa cells transfected with siRNAs (left column) or the cDNA (right column) to increase or decrease the expression of each of the  $Na_V\beta$ s, but no  $Na_V$  current was found, suggesting that the regulation of the expression of  $Na_V\beta$ s is not enough to promote the functional activity of  $Na_V$   $\alpha$ -subunits in the plasma membrane of CeCa cells. In all cases, currents were evoked at  $-10$  mV from a holding potential of  $-100$  mV.
