# Supplementary material for: Contribution of voltage-gated sodium channel β-subunits to cervical cancer cells metastatic behavior
Source: Springer Nature journal article supplement (doi:10.1186/s12935-019-0757-6), 2019-02-15
Supplement: MOESM5 [file 16484810]

**Additional file 5.**

**Contribution of voltage-gated sodium channel  $\beta$ -subunits to cervical cancer cells metastatic behavior**

**Ana Laura Sanchez-Sandoval, Juan Carlos Gomora\***

Departamento de Neuropatología Molecular, División de Neurociencias, Instituto de Fisiología Celular, Universidad Nacional Autónoma de México. Ciudad de México, 04510, México.

\*Corresponding author: [jgomora@ifc.unam.mx](mailto:jgomora@ifc.unam.mx)

## Normal cervix

---

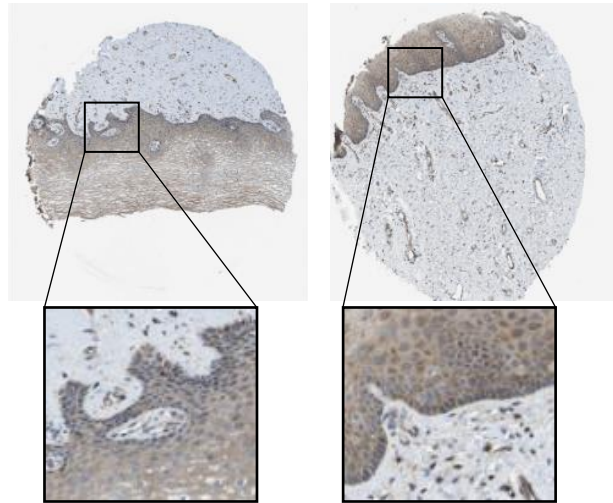

## Cervical cancer

---

### Squamous cell carcinoma

---

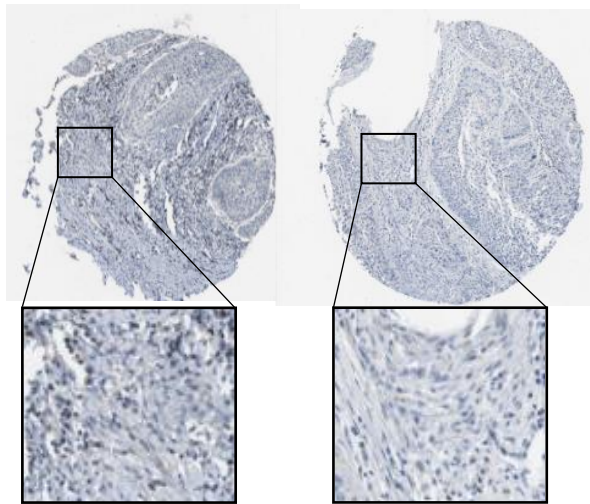

### Adenocarcinoma

---

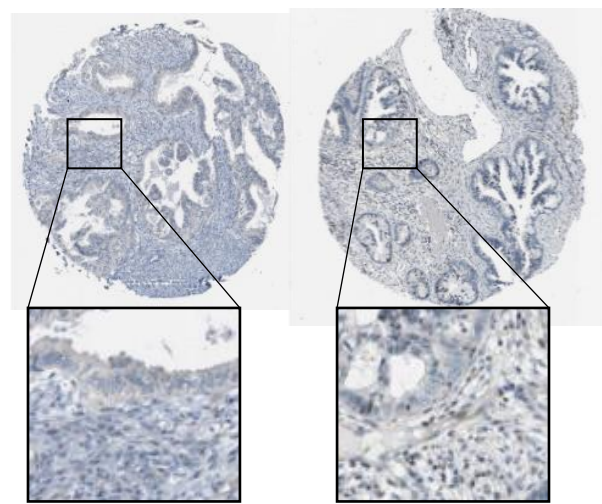

### Additional file 5. Analysis of Nav $\beta$ 4 expression in CeCa biopsies and normal cervical tissue.

Representative immunohistochemical images of four cervical cancer biopsies (two squamous cell carcinomas and two adenocarcinomas) and two normal cervix tissues showing the absence of Nav $\beta$ 4 in all the CeCa biopsies and the moderate expression of the protein in normal cervix. All the images were obtained from the Human Protein Atlas (<http://www.proteinatlas.org/>) (1,2). This database shows Nav $\beta$ 4 staining of three different normal cervix biopsies, all of them

expressing moderate amounts of the protein, and twelve different CeCa biopsies, showing the lack of Nav $\beta$ 4 signal in all of them, suggesting a correlation between the cervical cancer establishment and the downregulation of Nav $\beta$ 4 expression.

1. Uhlen M, Fagerberg L, Hallstrom BM, Lindskog C, Oksvold P, Mardinoglu A, et al. Proteomics. Tissue-based map of the human proteome. *Science*. 2015; 347(6220):1260-19.
2. Uhlen M, Oksvold P, Fagerberg L, Lundberg E, Jonasson K, Forsberg M, et al. Towards a knowledge-based Human Protein Atlas. *Nat Biotechnol*. 2010;28(12):1248-50.
