# Supplementary material for: Contribution of voltage-gated sodium channel β-subunits to cervical cancer cells metastatic behavior
Source: Cancer Cell Int. 2019 Feb 15;19:35. doi: 10.1186/s12935-019-0757-6 (PMC6377746; doi:10.1186/s12935-019-0757-6)
Supplement: Supplementary file 4 — Additional file 4. Synchronization of SiHa cells. Flow cytometry results for synchronization of SiHa cells. [file 12935_2019_757_MOESM4_ESM.pdf]

**Additional file 4.**

**Contribution of voltage-gated sodium channel  $\beta$ -subunits to cervical cancer cells metastatic behavior**

**Ana Laura Sanchez-Sandoval, Juan Carlos Gomora\***

Departamento de Neuropatología Molecular, División de Neurociencias, Instituto de Fisiología Celular, Universidad Nacional Autónoma de México. Ciudad de México, 04510, México.

\*Corresponding author: [jgomora@ifc.unam.mx](mailto:jgomora@ifc.unam.mx)

**A**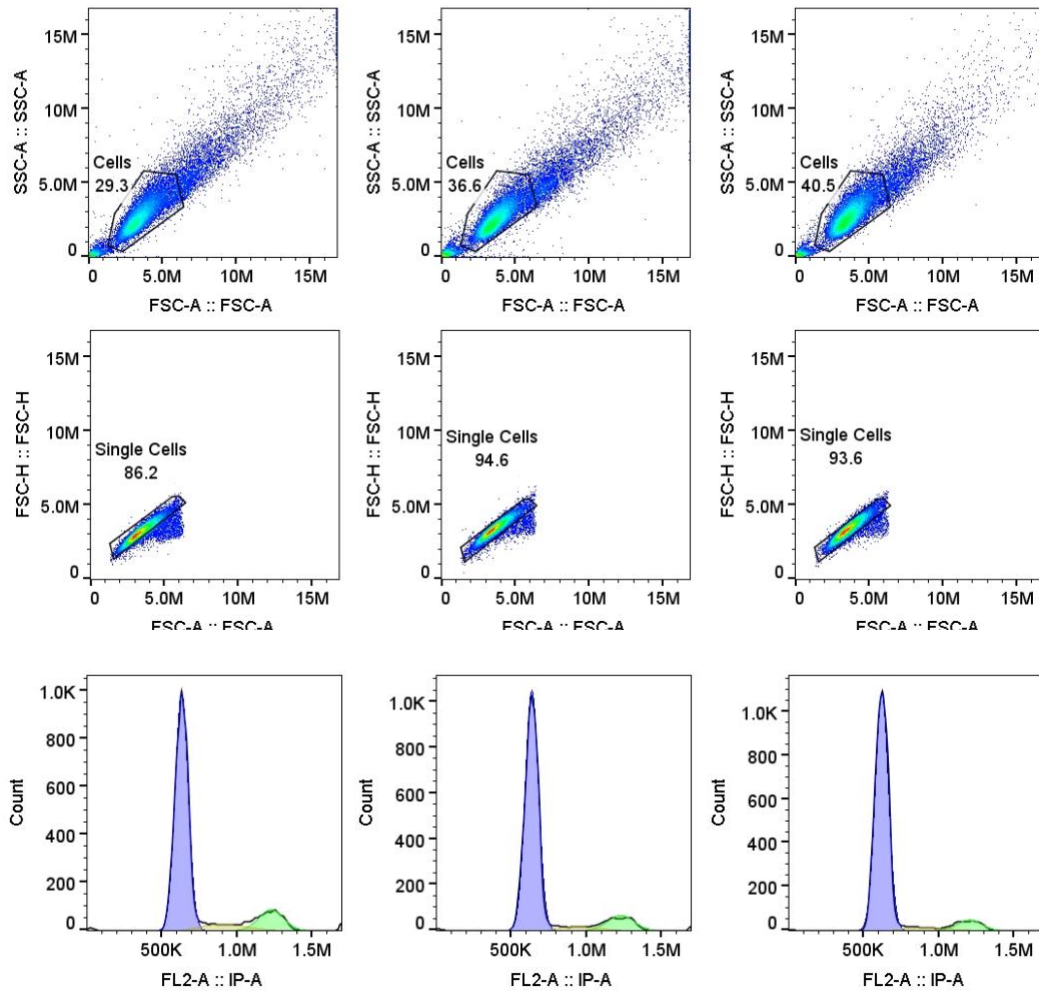**B**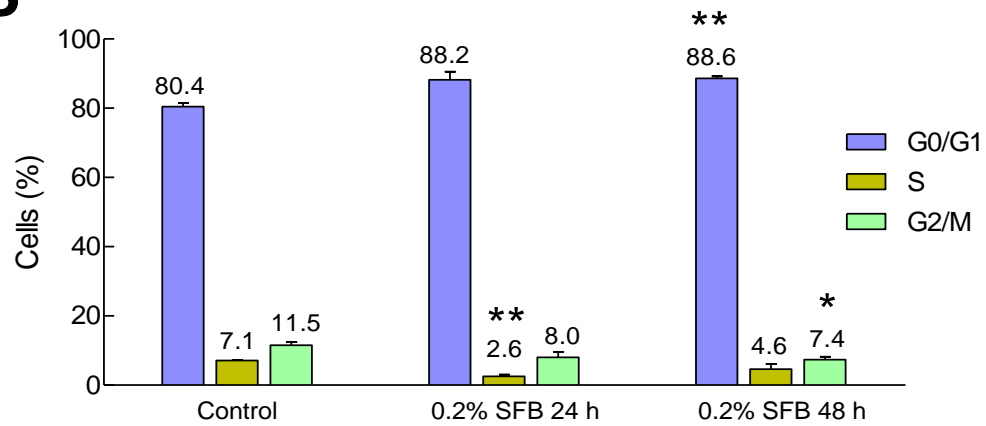

**Additional file 4. Synchronization of SiHa cells. A)** Cell cycle synchronization in SiHa cells was analyzed by flow cytometry after incubation of cells with low-serum conditions (0.2% FBS) for 24 h (middle column) and 48 h (right column), comparing with control conditions (10% FBS; left column). Cells were gated using an FSC-A vs SSC-A dot-plot (upper panels); then, single cells were sub-gated using an FSC-A vs FSC-H dot-plot (second row) and finally cell cycle analysis was then performed on the FL2-A histogram using the Dean-Jett-Fox algorithm (third row). For each condition, at least  $2 \times 10^4$  single cells were analyzed. Three independent experiments are summarized in the bar graphs (**B**) as means  $\pm$  S.D. of the relative percentage of cells in each cell cycle phase. Significance:  $*P < 0.05$ ,  $**P < 0.01$ , compared to control conditions.
